# Supplementary material for: Updated Mortality Analysis of SELTINE, the French Cohort of Nuclear Workers, 1968–2014
Source: MDPI journal article supplement (doi:10.3390/cancers15010079), 2022-12-23
Supplement: s1 [file s1]

**Supplementary Table S1.** ICD-10 codes, number of deaths, standardized\* mortality ratios (SMR) and 95% confidence intervals (CI) in the SELTINE cohort, period 1968-2014.

| Cause of death                                       | ICD-10 codes                                    | Observed deaths | SMR  | 95%CI     |
|------------------------------------------------------|-------------------------------------------------|-----------------|------|-----------|
| <b>All causes</b>                                    |                                                 | 15,695          | 0.64 | 0.63-0.65 |
| <b>Solid cancers</b>                                 | C00–C80, C97, except C46.3                      | 5691            | 0.71 | 0.69-0.73 |
| Mouth and pharynx                                    | C00–C14, C46.2                                  | 206             | 0.42 | 0.37-0.49 |
| Oesophagus                                           | C15                                             | 211             | 0.52 | 0.45-0.60 |
| Stomach                                              | C16                                             | 210             | 0.67 | 0.58-0.76 |
| Colon                                                | C18                                             | 428             | 0.76 | 0.69-0.84 |
| Rectum                                               | C19–C21                                         | 155             | 0.69 | 0.59-0.81 |
| Liver                                                | C22                                             | 307             | 0.62 | 0.55-0.69 |
| Gallbladder                                          | C23–C24                                         | 41              | 0.77 | 0.55-1.04 |
| Pancreas                                             | C25                                             | 367             | 0.92 | 0.82-1.01 |
| Peritoneum                                           | C26, C45.1, C48                                 | 84              | 0.75 | 0.59-0.92 |
| Nasal cavity                                         | C30–C31                                         | 48              | 0.44 | 0.32-0.58 |
| Larynx                                               | C32                                             | 103             | 0.44 | 0.36-0.53 |
| Trachea, bronchus, and lung                          | C33–C34                                         | 1421            | 0.67 | 0.64-0.71 |
| Pleura                                               | C38.4, C45.0                                    | 98              | 1.68 | 1.36-2.05 |
| Bones and articular cartilage                        | C40–C41                                         | 32              | 0.81 | 0.56-1.15 |
| Soft tissue                                          | C46.1, C47, C49                                 | 19              | 0.55 | 0.33-0.86 |
| Skin melanoma                                        | C43                                             | 94              | 1.22 | 0.99-1.50 |
| Skin other                                           | C44, C46, C46.0, C46.9                          | 15              | 0.65 | 0.36-1.07 |
| Breast (women)                                       | C50                                             | 153             | 1.04 | 0.88-1.22 |
| Corpus uteri (women)                                 | C54–C55, C58                                    | 23              | 0.76 | 0.48-1.15 |
| Ovary (women)                                        | C56, C57.0–C57.4, C57.8                         | 50              | 1.14 | 0.84-1.50 |
| Prostate (men)                                       | C61                                             | 473             | 0.84 | 0.76-0.92 |
| Bladder                                              | C67, C68                                        | 221             | 0.70 | 0.61-0.80 |
| Kidney                                               | C64–C66                                         | 166             | 0.85 | 0.73-0.99 |
| Brain and central nervous system                     | C70–C72                                         | 189             | 1.05 | 0.91-1.21 |
| <b>Tumors of lymphatic and hematopoietic tissues</b> | C46.3, C81–C96                                  | 545             | 0.90 | 0.83-0.98 |
| Hodgkin lymphoma                                     | C81                                             | 22              | 0.87 | 0.55-1.32 |
| Non-Hodgkin lymphoma                                 | C46.3, C82–C85, C88.0, C88.1, C88.3, C91.4, C96 | 207             | 0.95 | 0.82-1.08 |
| Multiple myeloma and IP** tumors                     | C88, C88.2, C88.7, C88.9, C90                   | 89              | 0.86 | 0.69-1.05 |
| Leukemia excluding CLL***                            | C91.0, C91.2–C91.3, C91.5, C91.7, C92–C95       | 176             | 0.87 | 0.75-1.01 |
| Acute myeloid leukemia                               | C92.0, C92.4–C92.5, C93.0, C94.0, C94.2–C94.5   | 67              | 0.91 | 0.70-1.15 |
| Chronic myeloid leukemia                             | C92.1, C93.1, C94.1                             | 22              | 0.74 | 0.46-1.12 |
| Acute lymphoblastic leukemia                         | C91.0                                           | 13              | 1.11 | 0.59-1.90 |
| Chronic lymphocytic leukemia                         | C91.1                                           | 48              | 0.99 | 0.73-1.31 |
| <b>Non-cancer causes of death</b>                    | E10–E14                                         |                 |      |           |

| Cause of death                                                          | ICD-10 codes                           | Observed deaths | SMR  | 95%CI     |
|-------------------------------------------------------------------------|----------------------------------------|-----------------|------|-----------|
| Diabetes mellitus                                                       | F00–F99                                | 188             | 0.49 | 0.43-0.57 |
| Mental and behavioural disorders                                        | G00–G99                                | 269             | 0.45 | 0.39-0.50 |
| Diseases of the nervous system                                          | F00, F01, F03, F05, G30, G20, G12.2    | 618             | 0.79 | 0.73-0.86 |
| Dementia, Alzheimer's disease, Parkinson's disease, moto-neuron disease | F00, F01, F03, F05, G30                | 553             | 0.85 | 0.78-0.92 |
| Dementia and Alzheimer's disease                                        | G20                                    | 334             | 0.81 | 0.72-0.90 |
| Parkinson's disease                                                     | G45, I00–I99                           | 139             | 0.99 | 0.83-1.17 |
| Circulatory diseases                                                    | I20–I25                                | 3582            | 0.62 | 0.60-0.64 |
| Ischemic heart diseases                                                 | G45, G45.0–G45.2, G45.8–G45.9, I60–I69 | 1333            | 0.66 | 0.62-0.69 |
| Cerebrovascular diseases                                                | G45, G45.0–G45.2, G45.8–G45.9, I60–I69 | 781             | 0.61 | 0.57-0.66 |
| Respiratory diseases                                                    | J00–J99                                | 628             | 0.48 | 0.44-0.52 |
| COPD                                                                    | J40–J44, J47                           | 186             | 0.43 | 0.37-0.49 |
| Asthma                                                                  | J45–J46                                | 28              | 0.50 | 0.33-0.72 |
| Digestive diseases                                                      | K00–K93                                | 633             | 0.42 | 0.39-0.46 |
| Cirrhosis                                                               | K70                                    | 177             | 0.32 | 0.28-0.37 |
| <b>External causes</b>                                                  | V01–Y89                                | 1559            | 0.63 | 0.60-0.66 |

ICD-10: International Classification of Diseases, 10th revision; \*on calendar period, age, and sex;

\*\* immuno-proliferative; \*\*\* chronic lymphocytic leukemia.

**Supplementary Table S2.** Parameter estimates of the excess relative rate (ERR) models for solid cancer and 10-year lagged cumulative colon dose in males only, SELTINE cohort, period 1968-2014.

| ERR model <sup>a</sup> (per Gy)                               | Coefficient      | 95%CI       | AIC   | p-value           |
|---------------------------------------------------------------|------------------|-------------|-------|-------------------|
| ERR( $d$ )= $\beta d$                                         | $\beta = 0.71$   | -0.28; 1.80 | 11671 | 0.16 <sup>b</sup> |
| Restricted range of cumulative dose 0-100 mGy<br>( $n=4986$ ) | $\beta = 0.57$   | -1.14; 2.41 |       | 0.53 <sup>c</sup> |
| First employment after 1956 ( $n=4357$ )                      | $\beta = 0.65$   | -0.40; 1.83 |       | 0.23 <sup>b</sup> |
| ERR( $d$ )= $\beta d + \gamma d^2$                            | $\beta = 1.37$   | -0.68; ne   | 11672 | 0.47 <sup>c</sup> |
|                                                               | $\gamma = -4.32$ | ne; 7.94    |       |                   |
| ERR( $d, aex$ )= $\beta d \cdot \exp(\nu \cdot aex)$          | $\beta = 0.68$   | -0.27; 1.78 | 11672 | 0.70 <sup>d</sup> |
|                                                               | $e^\nu = 0.69$   | ne          |       |                   |
| ERR( $d, a$ )= $\beta d \cdot a^\nu$                          | $\beta = 0.84$   | -0.19; 1.97 | 11672 | 0.35 <sup>d</sup> |
|                                                               | $\nu = -2.42$    | ne          |       |                   |
| ERR( $d$ )= $\beta d$ adjusted on neutron flag                | $\beta = 1.00$   | -0.06; 2.18 | 11672 | 0.21 <sup>b</sup> |
| ERR( $d$ )= $\beta d$ adjusted on internal contamination flag | $\beta = 0.70$   | -0.29; 1.80 | 11674 | 0.74 <sup>b</sup> |

<sup>a</sup> defined as  $\lambda_0(y, a, c, ses, duem)[1 + \text{ERR}(d, cov)]$ , where  $y$  is calendar year,  $a$  is attained age,  $c$  is company,  $ses$  is socioeconomic status,  $duem$  is duration of employment,  $d$  is cumulative colon dose, and  $cov$  is either attained age ( $a$ ) or age at exposure ( $aex$ ); CI: likelihood-based confidence interval; AIC: Akaike information criteria; p-value of a likelihood ratio test vs. <sup>b</sup> tested hypothesis:  $\beta=0$ , <sup>c</sup> tested hypothesis:  $\gamma=0$ , <sup>d</sup> tested hypothesis:  $\nu = 0$ ; ne: not estimated.

**Supplementary Table S3.** Parameter estimates of the excess relative rate (ERR) models for leukemia (excluding chronic lymphocytic leukemia) and 2-year lagged cumulative red bone marrow dose in males only, SELTINE cohort, period 1968-2014.

| ERR model <sup>a</sup> (per Gy)                                        | Coefficient       | 95%CI        | AIC    | p-value            |
|------------------------------------------------------------------------|-------------------|--------------|--------|--------------------|
| $ERR(d) = \beta d$                                                     | $\beta = 9.49$    | 1.60; 21.36  | 1237.8 | 0.01 <sup>b</sup>  |
| $ERR(d,a) = \beta d \cdot a^v$                                         | $\beta = 3.31$    | 0.94; 13.38  | 1235.4 | <0.01 <sup>b</sup> |
|                                                                        | $v = 8.96$        | 0.89; 17.57  |        |                    |
| Restricted range of cumulative dose 0-100 mGy ( $n=149$ )              | $\beta = 1.37$    | 0.06; 16.19  | -      | 0.09 <sup>b</sup>  |
| First employment after 1956 ( $n=138$ )                                | $\beta = 1.53$    | 0.14; ne     | -      | 0.04 <sup>b</sup>  |
| $ERR(d,a,aex) = \beta d \cdot a^v \cdot \exp(\mu \cdot aex)$           | $\beta = 3.22$    | 0.92; 14.15  | 1237.4 | -                  |
|                                                                        | $\mu = 9.16$      | -0.81; 23.29 |        |                    |
|                                                                        | $e^v = 0.95$      | 0.90; 8.05   |        |                    |
| $ERR(d,a) = (\beta d + \gamma d^2) \cdot a^v$                          | $\beta = 4.13$    | 2.63; ne     | 1236.9 | 0.45 <sup>c</sup>  |
|                                                                        | $\gamma = -11.06$ | ne; 48.05    |        |                    |
| $ERR(d,a) = \beta d \cdot a^v$ adjusted on neutron flag                | $\beta = 2.32$    | ne; 11.29    | 1236.2 | 0.20 <sup>d</sup>  |
| $ERR(d,a) = \beta d \cdot a^v$ adjusted on internal contamination flag | $\beta = 3.61$    | 1.07; 14.21  | 1237.9 | 0.46 <sup>d</sup>  |

<sup>a</sup> defined as  $\lambda_o(y,a,c,duem)[1 + ERR(d,cov)]$ , where  $y$  is calendar year,  $a$  is attained age,  $c$  is company,  $duem$  is duration of employment,  $d$  is cumulative colon dose, and  $cov$  is a set of covariables;  $aex$ : age at exposure; CI: likelihood-based confidence interval; AIC: Akaike information criteria; p-value of a likelihood ratio test vs. <sup>b</sup> tested hypothesis:  $\beta=0$ , <sup>c</sup> tested hypothesis:  $\gamma=0$ , <sup>d</sup> tested hypothesis:  $v = 0$ ; ne: not estimated.
